# Supplementary material
Source: PubMed Central journal article supplement (PMC5714267)
Supplement: NIHMS74341-supplement-1.pdf [file NIHMS74341-supplement-1.pdf]

# **Warming alters energetic structure and function but not resilience of soil food webs**

**Benjamin Schwarz, Andrew D. Barnes, Madhav P. Thakur, Ulrich Brose, Marcel Ciobanu,  
Peter B. Reich, Roy L. Rich, Benjamin Rosenbaum, Artur Stefanski, Nico Eisenhauer**

## Supplementary Figures

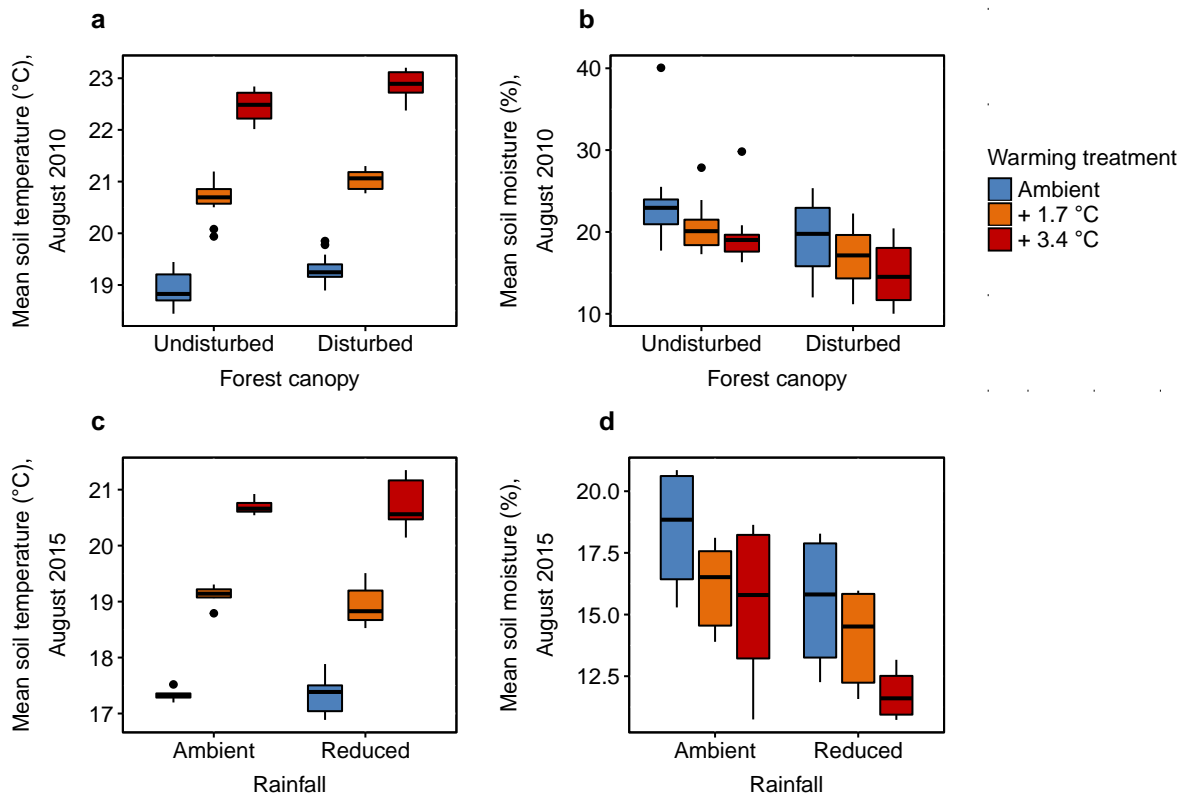

**Supplementary Figure 1.** Treatment effects on soil temperature and soil moisture. In the first experiment, the mean soil temperature in the sampling month increased with warming ( $\chi^2(1) = 4779.751$ ,  $p < 0.001$ ) and canopy disturbance ( $\chi^2(1) = 7.711$ ,  $p = 0.005$ ) (a), while the mean soil moisture in the sampling month decreased with warming ( $\chi^2(1) = 46.619$ ,  $p < 0.001$ ) and canopy disturbance ( $\chi^2(1) = 5.395$ ,  $p = 0.020$ ) (b). In the second experiment, the mean soil temperature in the sampling month increased with warming ( $\chi^2(1) = 1533.125$ ,  $p < 0.001$ ), but was not affected by drought ( $\chi^2(1) = 0.394$ ,  $p = 0.530$ ) (c), while the mean soil moisture in the sampling month was not affected by warming at ambient rainfall, but sharply declined with warming at reduced rainfall (warming  $\times$  drought interaction:  $\chi^2(1) = 7.618$ ,  $p = 0.006$ ) (d). Box plots are based on median (horizontal line), first and third quartile (rectangle),  $1.5 \times$  interquartile range (whiskers), and outliers (isolated points).

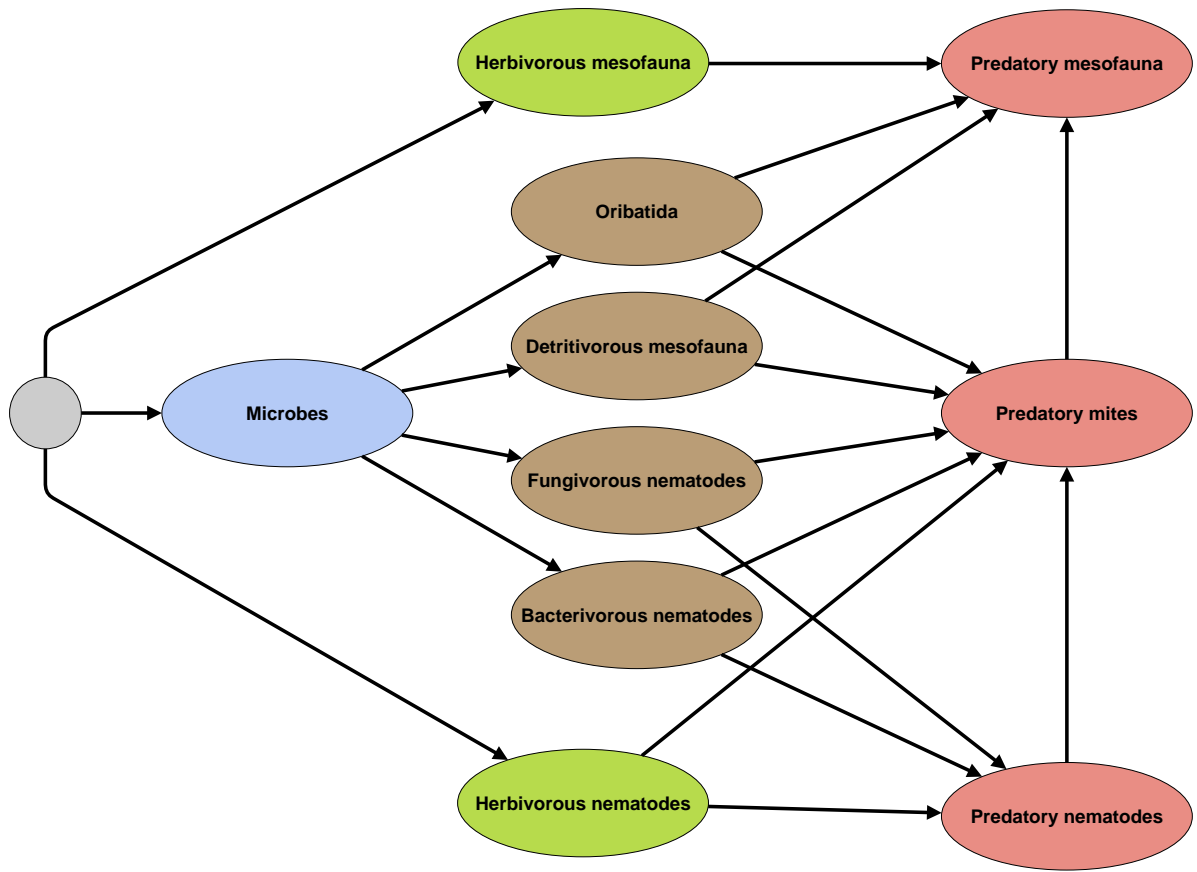

**Supplementary Figure 2.** Soil food web diagram presenting the feeding relationships among microbes and the nine faunal feeding guilds. Colors indicate different trophic levels: blue = microbes, brown = detritivores, green = herbivores, red = predators. The gray circle represents basal resources provided by primary producers.

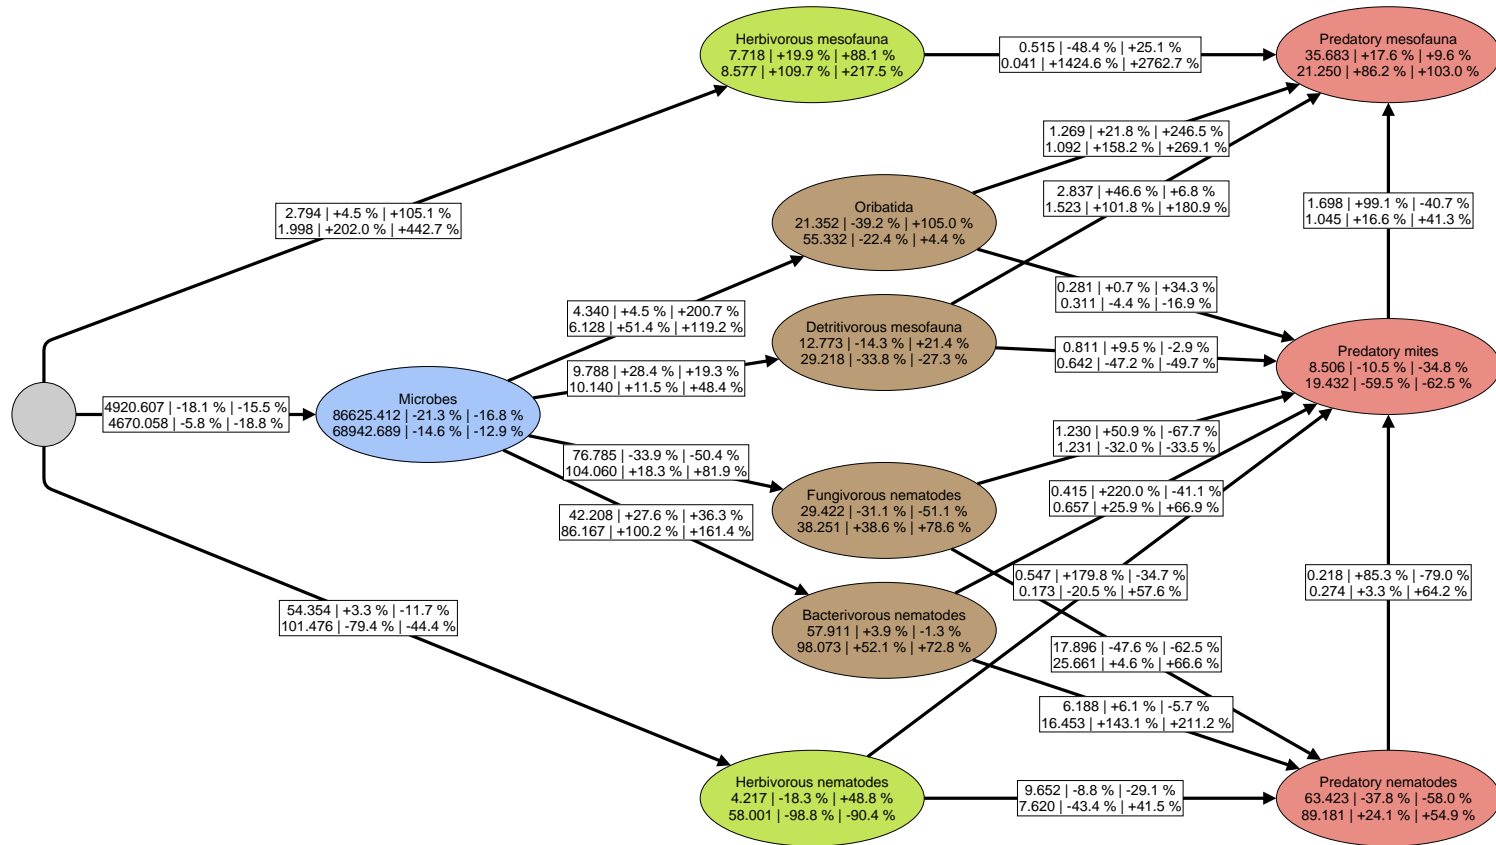

**Supplementary Figure 3.** Soil food web diagram presenting all feeding guilds and their trophic relationships in the first experiment. Numbers in nodes represent biomasses ( $\text{mg m}^{-2}$ ), and numbers attached to arrows represent energy fluxes ( $\text{mg C m}^{-2} \text{d}^{-1}$ ) between the respective feeding guilds. The first line refers to undisturbed, the second line to disturbed canopy habitats. The first value in each line is the mean biomass or energy flux in the ambient temperature treatment, while second and third values indicate relative changes with  $+1.7^\circ\text{C}$  and  $+3.4^\circ\text{C}$  warming compared to ambient temperature. Colors indicate different trophic levels: blue = microbes, brown = detritivores, green = herbivores, red = predators.

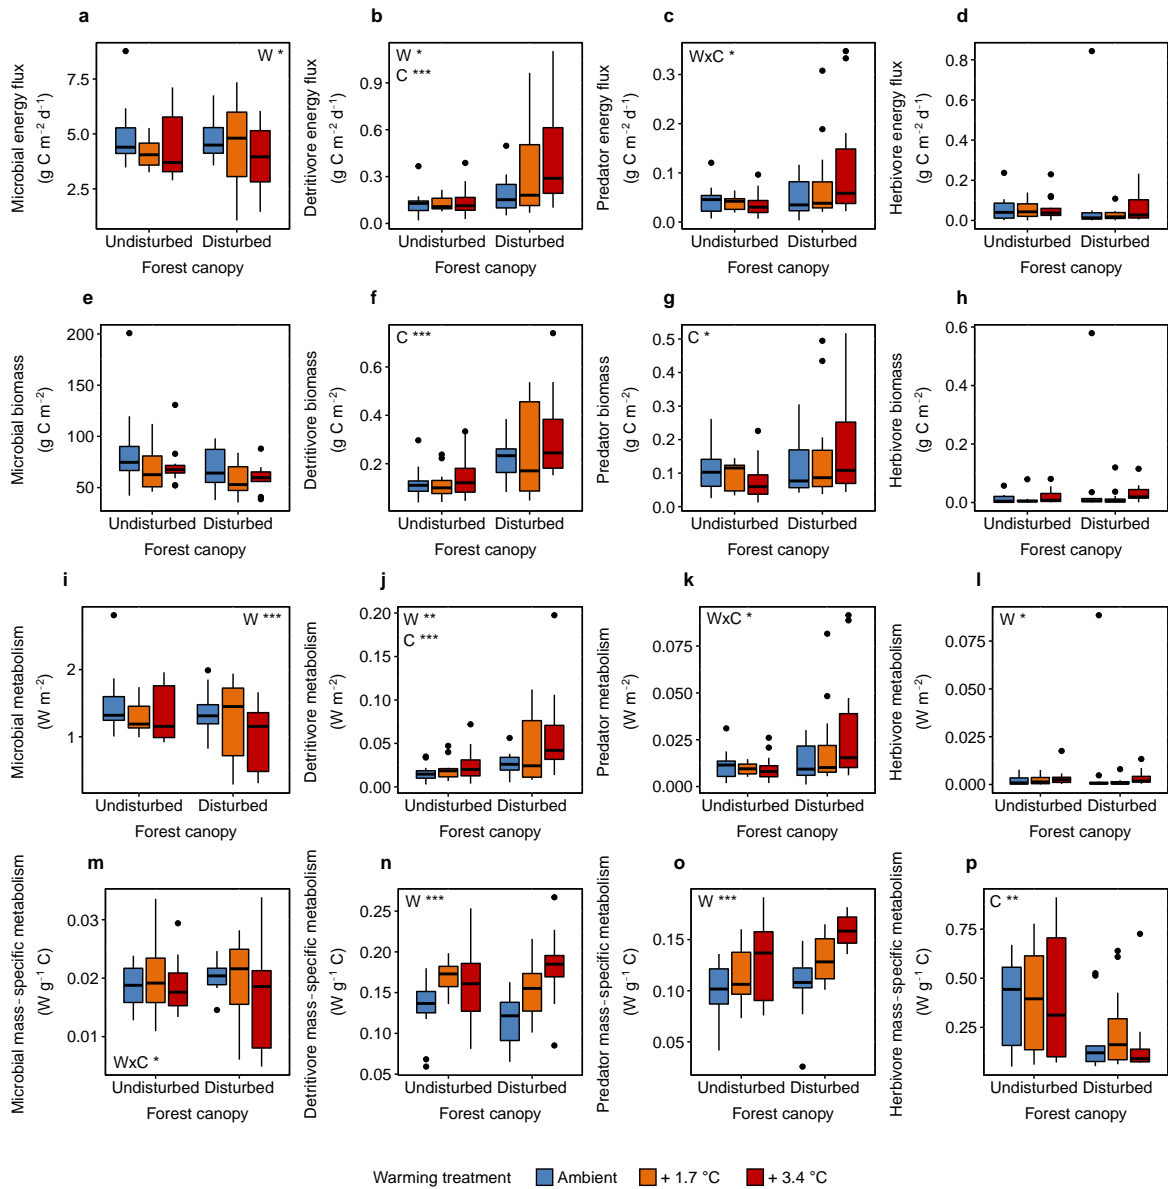

**Supplementary Figure 4.** Effects of warming (W) and canopy disturbance (C) on energy fluxes (a–d), biomass (e–h), metabolism (i–l), and mass-specific metabolism (m–p) of microbes (a, e, i, m), detritivores (b, f, j, n), predators (c, g, k, o), and herbivores (d, h, l, p) in the first experiment. Box plots are based on median (horizontal line), first and third quartile (rectangle),  $1.5 \times$  interquartile range (whiskers), and outliers (isolated points). Asterisks denote significant effects of warming (W), canopy disturbance (C), and their interaction (WxC): \*  $p < 0.05$ ; \*\*  $p < 0.01$ ; \*\*\*  $p < 0.001$ .

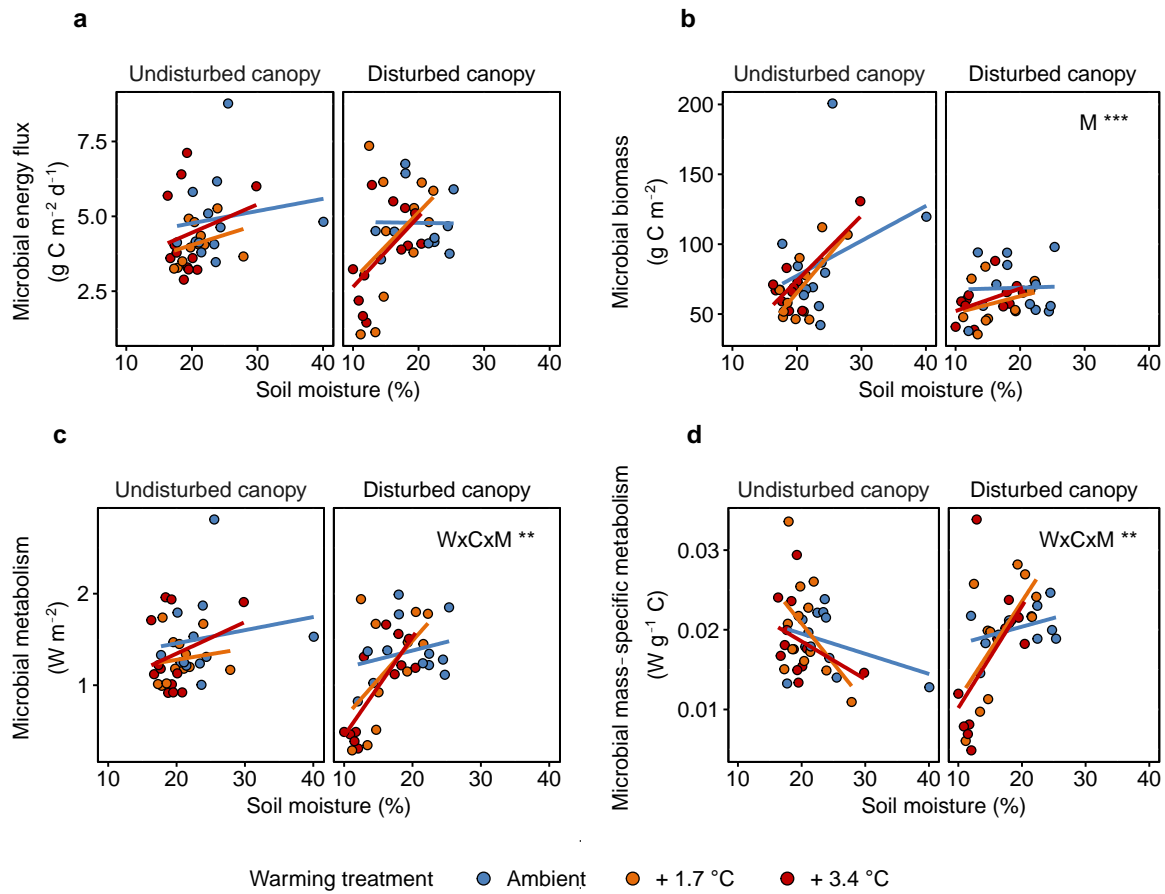

**Supplementary Figure 5.** Relationships of soil moisture and microbial energy flux (a), biomass (b), metabolism (c), and mass-specific metabolism (d) in the first experiment. They are separately presented for each treatment combination. Asterisks denote significant effects of warming (W), canopy disturbance (C), soil moisture (M), and all interactions: \*  $p < 0.05$ ; \*\*  $p < 0.01$ ; \*\*\*  $p < 0.001$ .

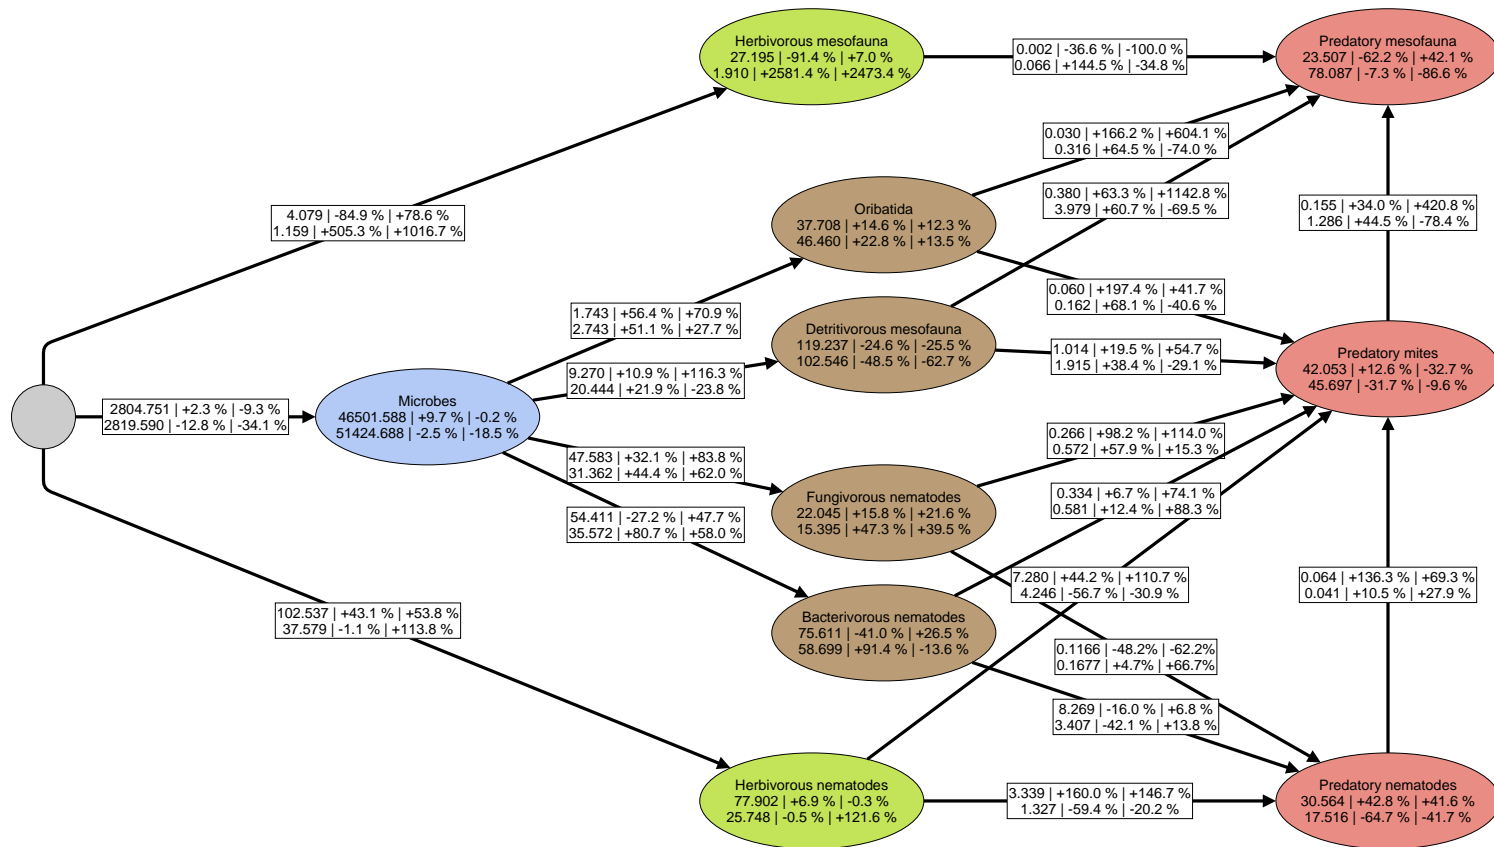

**Supplementary Figure 6.** Soil food web diagram presenting all feeding guilds and their trophic relationships in the second experiment. Numbers in nodes represent biomasses ( $\text{mg m}^{-2}$ ), and numbers attached to arrows represent energy fluxes ( $\text{mg C m}^{-2} \text{d}^{-1}$ ) between the respective feeding guilds. The first line refers to undisturbed, the second line to disturbed canopy habitats. The first value in each line is the mean biomass or energy flux in the ambient temperature treatment, while second and third values indicate relative changes with  $+1.7^\circ\text{C}$  and  $+3.4^\circ\text{C}$  warming compared to ambient temperature. Colors indicate different trophic levels: blue = microbes, brown = detritivores, green = herbivores, red = predators. Note that energy fluxes from nematodes to predatory mesofauna are not shown as they entirely depended on the presence of Symphyla, which, however, were only present in four out of 36 plots.

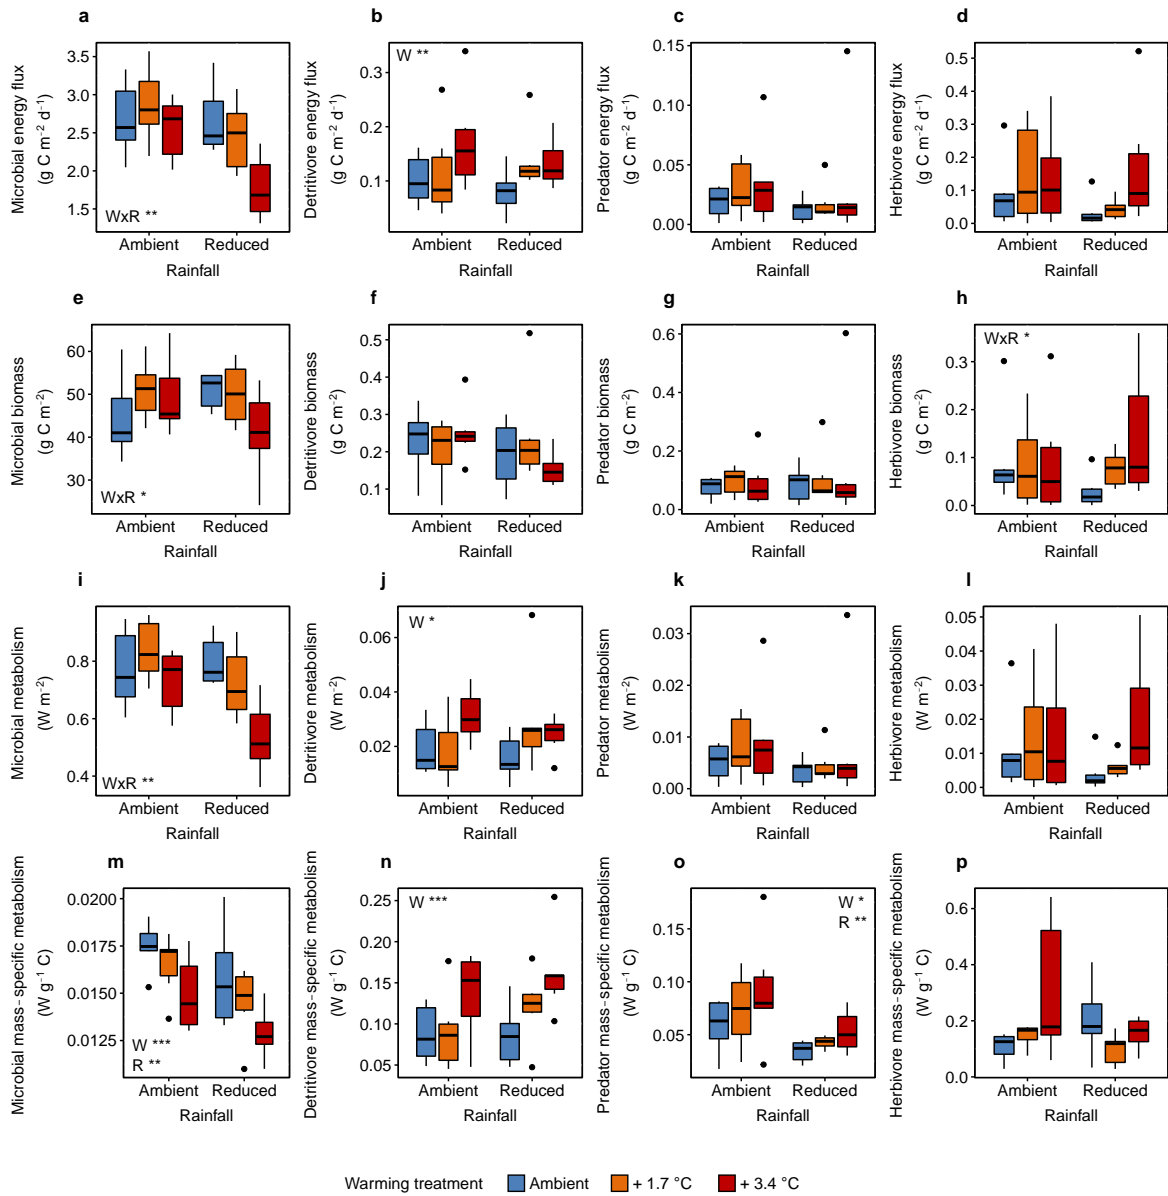

**Supplementary Figure 7.** Effects of warming (W) and rainfall reduction (R) on energy fluxes (a–d), biomass (e–h), metabolism (i–l), and mass-specific metabolism (m–p) of microbes (a, e, i, m), detritivores (b, f, j, n), predators (c, g, k, o), and herbivores (d, h, l, p) in the second experiment. Box plots are based on median (horizontal line), first and third quartile (rectangle),  $1.5 \times$  interquartile range (whiskers), and outliers (isolated points). Asterisks denote significant effects of warming (W), rainfall reduction (R), and their interaction (WxR): \*  $p < 0.05$ ; \*\*  $p < 0.01$ ; \*\*\*  $p < 0.001$ .



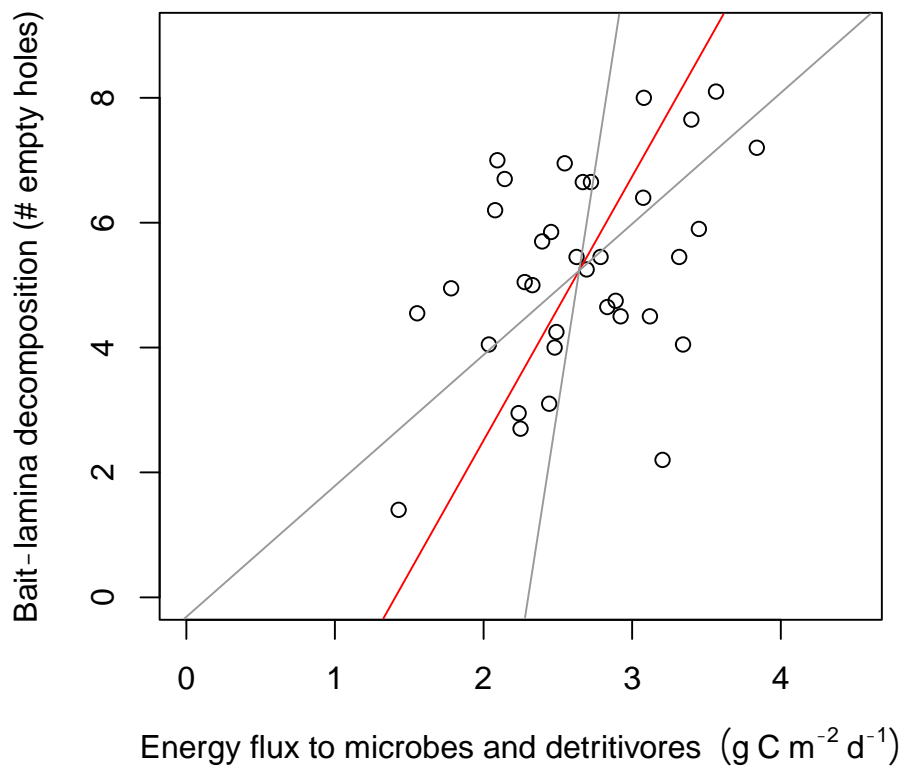

**Supplementary Figure 8.** Ranged major axis regression of the combined energy fluxes to microbes and detritivorous fauna on bait-lamina data.  $n = 35$ ,  $r^2 = 0.164$ , slope=4.227 (95% CI=2.097; 15.251), intercept=-5.943 (95% CI=-35.089; -0.311),  $p=0.009$  (one-tailed, 9999 permutations).

## Supplementary Tables

**Supplementary Table 1.** Results of linear mixed effects models testing the effects of warming, canopy disturbance, and their interaction on metabolism of the whole food web, microbes, total fauna, and the three faunal trophic groups (Detritivores, Predators, Herbivores) and on mass-specific metabolism of microbes, total fauna, and the three faunal trophic groups (Detritivores, Predators, Herbivores). (a) Significance of fixed effects obtained by Wald chi-square tests. Significant effects ( $p < 0.05$ ) are reported in bold. (b) Results of post-hoc Tukey's HSD tests performed for models with significant ( $p < 0.05$ ) and marginally significant ( $p < 0.1$ ) interaction terms. Asterisks denote significance levels: \*  $p < 0.05$ ; \*\*  $p < 0.01$ ; \*\*\*  $p < 0.001$ .

(a)

|                                                           | Transformation        | Warming  |    |                  | Canopy   |    |                  | Warming x Canopy |    |              |
|-----------------------------------------------------------|-----------------------|----------|----|------------------|----------|----|------------------|------------------|----|--------------|
|                                                           |                       | $\chi^2$ | df | p-value          | $\chi^2$ | df | p-value          | $\chi^2$         | df | p-value      |
| <b>Metabolism (<math>W m^{-2}</math>)</b>                 |                       |          |    |                  |          |    |                  |                  |    |              |
| <b>Whole food web</b>                                     | $\log_{10}(x)$        | 7.961    | 1  | <b>0.005</b>     | 1.044    | 1  | 0.307            | 2.065            | 1  | 0.151        |
| <b>Microbes</b>                                           | $\log_{10}(x)$        | 11.040   | 1  | <b>&lt;0.001</b> | 1.696    | 1  | 0.193            | 3.341            | 1  | 0.068        |
| <b>Fauna</b>                                              | $\log_{10}(x)$        | 5.015    | 1  | <b>0.025</b>     | 15.847   | 1  | <b>&lt;0.001</b> | 1.893            | 1  | 0.169        |
| <b>Detritivores</b>                                       | $\log_{10}(x)$        | 7.714    | 1  | <b>0.005</b>     | 12.835   | 1  | <b>&lt;0.001</b> | 0.911            | 1  | 0.340        |
| <b>Predators</b>                                          | $\log_{10}(x)$        | 1.991    | 1  | 0.158            | 6.379    | 1  | <b>0.012</b>     | 4.622            | 1  | <b>0.032</b> |
| <b>Herbivores</b>                                         | $\log_{10}(x+0.0001)$ | 5.302    | 1  | <b>0.021</b>     | 0.099    | 1  | 0.753            | 0.007            | 1  | 0.935        |
| <b>Mass-specific metabolism (<math>W g^{-1} C</math>)</b> |                       |          |    |                  |          |    |                  |                  |    |              |
| <b>Microbes</b>                                           | $\log_{10}(x)$        | 4.533    | 1  | <b>0.033</b>     | 0.493    | 1  | 0.482            | 4.798            | 1  | <b>0.028</b> |
| <b>Fauna</b>                                              | $\log_{10}(x)$        | 17.397   | 1  | <b>&lt;0.001</b> | 0.281    | 1  | 0.596            | 0.891            | 1  | 0.345        |
| <b>Detritivores</b>                                       | $\log_{10}(x)$        | 14.373   | 1  | <b>&lt;0.001</b> | 0.102    | 1  | 0.749            | 2.024            | 1  | 0.155        |
| <b>Predators</b>                                          | $\log_{10}(x)$        | 18.972   | 1  | <b>&lt;0.001</b> | 2.723    | 1  | 0.099            | 1.314            | 1  | 0.252        |
| <b>Herbivores</b>                                         | $\log_{10}(x)$        | 0.251    | 1  | 0.616            | 6.730    | 1  | <b>0.009</b>     | 0.001            | 1  | 0.973        |

(b)

| Model                                                             | Linear hypotheses          | Estimate | Std. Error | z value | Pr(> z ) |
|-------------------------------------------------------------------|----------------------------|----------|------------|---------|----------|
| Predator<br>metabolism ~<br>Warming *<br>Canopy                   | undisturbed:1.7 - 0 == 0   | 0.041    | 0.083      | 0.493   | 0.857    |
|                                                                   | undisturbed:3.4 - 0 == 0   | 0.082    | 0.165      | 0.493   | 0.857    |
|                                                                   | undisturbed:3.4 - 1.7 == 0 | 0.041    | 0.083      | 0.493   | 0.857    |
|                                                                   | disturbed:1.7 - 0 == 0     | -0.214   | 0.085      | -2.524  | 0.023 *  |
|                                                                   | disturbed:3.4 - 0 == 0     | -0.427   | 0.169      | -2.524  | 0.023 *  |
|                                                                   | disturbed:3.4 - 1.7 == 0   | -0.214   | 0.085      | -2.524  | 0.023 *  |
| Microbial<br>mass-specific<br>metabolism ~<br>Warming *<br>Canopy | undisturbed:1.7 - 0 == 0   | -0.003   | 0.077      | -0.043  | 0.999    |
|                                                                   | undisturbed:3.4 - 0 == 0   | -0.007   | 0.154      | -0.043  | 0.999    |
|                                                                   | undisturbed:3.4 - 1.7 == 0 | -0.003   | 0.077      | -0.043  | 0.999    |
|                                                                   | disturbed:1.7 - 0 == 0     | 0.235    | 0.077      | 3.054   | 0.005 ** |
|                                                                   | disturbed:3.4 - 0 == 0     | 0.470    | 0.154      | 3.054   | 0.005 ** |
|                                                                   | disturbed:3.4 - 1.7 == 0   | 0.235    | 0.077      | 3.054   | 0.005 ** |

**Supplementary Table 2.** Post-hoc Tukey's HSD tests performed for linear mixed effects models with significant ( $p < 0.05$ ) and marginally significant ( $p < 0.1$ ) interaction terms in the first experiment (see Table 1). Asterisks denote significance levels: \*  $p < 0.05$ ; \*\*  $p < 0.01$ ; \*\*\*  $p < 0.001$ .

| Model                                                   | Linear hypotheses          | Estimate | Std. Error | z value | Pr(> z ) |     |
|---------------------------------------------------------|----------------------------|----------|------------|---------|----------|-----|
| Faunal energy flux ~ Warming * Canopy                   | undisturbed:1.7 - 0 == 0   | 0.019    | 0.081      | 0.239   | 0.964    |     |
|                                                         | undisturbed:3.4 - 0 == 0   | 0.039    | 0.161      | 0.239   | 0.964    |     |
|                                                         | undisturbed:3.4 - 1.7 == 0 | 0.019    | 0.081      | 0.239   | 0.964    |     |
|                                                         | disturbed:1.7 - 0 == 0     | -0.193   | 0.082      | -2.337  | 0.039    | *   |
|                                                         | disturbed:3.4 - 0 == 0     | -0.385   | 0.165      | -2.337  | 0.039    | *   |
|                                                         | disturbed:3.4 - 1.7 == 0   | -0.193   | 0.082      | -2.337  | 0.039    | *   |
| Detritivore energy flux ~ Warming * Canopy              | undisturbed:1.7 - 0 == 0   | -0.009   | 0.077      | -0.115  | 0.992    |     |
|                                                         | undisturbed:3.4 - 0 == 0   | -0.018   | 0.153      | -0.115  | 0.992    |     |
|                                                         | undisturbed:3.4 - 1.7 == 0 | -0.009   | 0.077      | -0.115  | 0.992    |     |
|                                                         | disturbed:1.7 - 0 == 0     | -0.222   | 0.078      | -2.826  | 0.009    | **  |
|                                                         | disturbed:3.4 - 0 == 0     | -0.444   | 0.157      | -2.826  | 0.009    | **  |
|                                                         | disturbed:3.4 - 1.7 == 0   | -0.222   | 0.078      | -2.826  | 0.009    | **  |
| Predator energy flux ~ Warming * Canopy                 | undisturbed:1.7 - 0 == 0   | 0.053    | 0.083      | 0.640   | 0.772    |     |
|                                                         | undisturbed:3.4 - 0 == 0   | 0.107    | 0.167      | 0.640   | 0.772    |     |
|                                                         | undisturbed:3.4 - 1.7 == 0 | 0.053    | 0.083      | 0.640   | 0.772    |     |
|                                                         | disturbed:1.7 - 0 == 0     | -0.213   | 0.085      | -2.499  | 0.025    | *   |
|                                                         | disturbed:3.4 - 0 == 0     | -0.426   | 0.171      | -2.499  | 0.025    | *   |
|                                                         | disturbed:3.4 - 1.7 == 0   | -0.213   | 0.085      | -2.499  | 0.025    | *   |
| Predator biomass ~ Warming * Canopy                     | undisturbed:1.7 - 0 == 0   | 0.136    | 0.086      | 1.578   | 0.216    |     |
|                                                         | undisturbed:3.4 - 0 == 0   | 0.272    | 0.173      | 1.578   | 0.216    |     |
|                                                         | undisturbed:3.4 - 1.7 == 0 | 0.136    | 0.086      | 1.578   | 0.216    |     |
|                                                         | disturbed:1.7 - 0 == 0     | -0.093   | 0.088      | -1.048  | 0.502    |     |
|                                                         | disturbed:3.4 - 0 == 0     | -0.185   | 0.176      | -1.048  | 0.502    |     |
|                                                         | disturbed:3.4 - 1.7 == 0   | -0.093   | 0.088      | -1.048  | 0.502    |     |
| Relative energy flux to microbes ~ Warming * Canopy     | undisturbed:1.7 - 0 == 0   | 0.018    | 0.071      | 0.258   | 0.959    |     |
|                                                         | undisturbed:3.4 - 0 == 0   | 0.037    | 0.142      | 0.258   | 0.959    |     |
|                                                         | undisturbed:3.4 - 1.7 == 0 | 0.018    | 0.071      | 0.258   | 0.959    |     |
|                                                         | disturbed:1.7 - 0 == 0     | 0.250    | 0.073      | 3.448   | 0.001    | **  |
|                                                         | disturbed:3.4 - 0 == 0     | 0.500    | 0.145      | 3.448   | 0.001    | **  |
|                                                         | disturbed:3.4 - 1.7 == 0   | 0.250    | 0.073      | 3.448   | 0.001    | **  |
| Relative energy flux to detritivores ~ Warming * Canopy | undisturbed:1.7 - 0 == 0   | -0.043   | 0.069      | -0.628  | 0.779    |     |
|                                                         | undisturbed:3.4 - 0 == 0   | -0.087   | 0.138      | -0.628  | 0.779    |     |
|                                                         | undisturbed:3.4 - 1.7 == 0 | -0.043   | 0.069      | -0.628  | 0.779    |     |
|                                                         | disturbed:1.7 - 0 == 0     | -0.278   | 0.071      | -3.939  | <0.001   | *** |
|                                                         | disturbed:3.4 - 0 == 0     | -0.556   | 0.141      | -3.939  | <0.001   | *** |
|                                                         | disturbed:3.4 - 1.7 == 0   | -0.278   | 0.071      | -3.939  | <0.001   | *** |
| Relative energy flux to predators ~ Warming * Canopy    | undisturbed:1.7 - 0 == 0   | 0.020    | 0.075      | 0.262   | 0.957    |     |
|                                                         | undisturbed:3.4 - 0 == 0   | 0.040    | 0.151      | 0.262   | 0.957    |     |
|                                                         | undisturbed:3.4 - 1.7 == 0 | 0.020    | 0.075      | 0.262   | 0.957    |     |
|                                                         | disturbed:1.7 - 0 == 0     | -0.258   | 0.077      | -3.333  | 0.002    | **  |
|                                                         | disturbed:3.4 - 0 == 0     | -0.516   | 0.155      | -3.333  | 0.002    | **  |
|                                                         | disturbed:3.4 - 1.7 == 0   | -0.258   | 0.077      | -3.333  | 0.002    | **  |

**Supplementary Table 3.** Results of linear mixed effects models testing the effects of warming, canopy disturbance, soil moisture, and their interactions on microbial energy flux, biomass, metabolism, and mass-specific metabolism in the first experiment. Models were selected based on AIC in a stepwise backward selection procedure eliminating interaction terms but not main effects. Significance of fixed effects obtained by Wald chi-square tests. Asterisks denote significance levels: \*  $p < 0.05$ ; \*\*  $p < 0.01$ ; \*\*\*  $p < 0.001$ . Marginally significant effects ( $p < 0.1$ ) are marked with †.

| Response                                                    | Fixed effects               | $\chi^2$ | df | p-value    |
|-------------------------------------------------------------|-----------------------------|----------|----|------------|
| <b>Microbial energy flux</b><br>$\log_{10}(x)$              | Warming                     | 1.950    | 1  | 0.163      |
|                                                             | Canopy                      | 0.031    | 1  | 0.860      |
|                                                             | Moisture                    | 0.750    | 1  | 0.386      |
|                                                             | Warming : Moisture          | 3.814    | 1  | 0.051 †    |
| <b>Microbial biomass</b><br>$\log_{10}(x)$                  | Warming                     | 0.031    | 1  | 0.861      |
|                                                             | Canopy                      | 0.113    | 1  | 0.737      |
|                                                             | Moisture                    | 15.444   | 1  | <0.001 *** |
| <b>Microbial metabolism</b><br>$\log_{10}(x)$               | Warming                     | 3.221    | 1  | 0.073 †    |
|                                                             | Canopy                      | 0.587    | 1  | 0.444      |
|                                                             | Moisture                    | 1.666    | 1  | 0.197      |
|                                                             | Warming : Canopy            | 0.416    | 1  | 0.519      |
|                                                             | Warming : Moisture          | 8.571    | 1  | 0.003 **   |
|                                                             | Canopy : Moisture           | 3.061    | 1  | 0.080 †    |
|                                                             | Warming : Canopy : Moisture | 7.483    | 1  | 0.006 **   |
| <b>Microbial mass-specific metabolism</b><br>$\log_{10}(x)$ | Warming                     | 3.022    | 1  | 0.082 †    |
|                                                             | Canopy                      | 0.289    | 1  | 0.591      |
|                                                             | Moisture                    | 0.608    | 1  | 0.436      |
|                                                             | Warming : Canopy            | 0.001    | 1  | 0.976      |
|                                                             | Warming : Moisture          | 5.749    | 1  | 0.016 *    |
|                                                             | Canopy : Moisture           | 2.093    | 1  | 0.148      |
|                                                             | Warming : Canopy : Moisture | 7.263    | 1  | 0.007 **   |

**Supplementary Table 4.** Results of linear mixed effects models testing the effects of warming, drought (reduced rainfall), and their interaction on metabolism of the whole food web, microbes, total fauna, and the three faunal trophic groups (Detritivores, Predators, Herbivores) and on mass-specific metabolism of microbes, total fauna, and the three faunal trophic groups (Detritivores, Predators, Herbivores). (a) Significance of fixed effects obtained by Wald chi-square tests. Significant effects ( $p < 0.05$ ) are reported in bold. (b) Results of post-hoc Tukey's HSD tests performed for models with significant ( $p < 0.05$ ) and marginally significant ( $p < 0.1$ ) interaction terms. Asterisks denote significance levels: \*  $p < 0.05$ ; \*\*  $p < 0.01$ ; \*\*\*  $p < 0.001$ .

(a)

|                                                           | Transformation | Warming  |    |                  | Drought  |    |              | Warming x Drought |    |              |
|-----------------------------------------------------------|----------------|----------|----|------------------|----------|----|--------------|-------------------|----|--------------|
|                                                           |                | $\chi^2$ | df | p-value          | $\chi^2$ | df | p-value      | $\chi^2$          | df | p-value      |
| <b>Metabolism (<math>W m^{-2}</math>)</b>                 |                |          |    |                  |          |    |              |                   |    |              |
| <b>Whole food web</b>                                     | $\log_{10}(x)$ | 10.638   | 1  | <b>0.001</b>     | 9.730    | 1  | <b>0.002</b> | 9.679             | 1  | <b>0.002</b> |
| <b>Microbes</b>                                           | $\log_{10}(x)$ | 14.897   | 1  | <b>&lt;0.001</b> | 8.482    | 1  | <b>0.004</b> | 9.632             | 1  | <b>0.002</b> |
| <b>Fauna</b>                                              | $\log_{10}(x)$ | 12.412   | 1  | <b>&lt;0.001</b> | 0.400    | 1  | 0.527        | 0.510             | 1  | 0.475        |
| <b>Detritivores</b>                                       | $\log_{10}(x)$ | 5.887    | 1  | <b>0.015</b>     | 0.012    | 1  | 0.915        | 0.004             | 1  | 0.947        |
| <b>Predators</b>                                          | $\log_{10}(x)$ | 1.155    | 1  | 0.282            | 1.399    | 1  | 0.237        | 0.024             | 1  | 0.876        |
| <b>Herbivores</b>                                         | $\log_{10}(x)$ | 2.437    | 1  | 0.119            | 0.004    | 1  | 0.949        | 3.150             | 1  | 0.076        |
| <b>Mass-specific metabolism (<math>W g^{-1} C</math>)</b> |                |          |    |                  |          |    |              |                   |    |              |
| <b>Microbes</b>                                           | $\log_{10}(x)$ | 12.468   | 1  | <b>&lt;0.001</b> | 9.761    | 1  | <b>0.002</b> | 0.138             | 1  | 0.710        |
| <b>Fauna</b>                                              | $\log_{10}(x)$ | 17.277   | 1  | <b>&lt;0.001</b> | 0.138    | 1  | 0.710        | 0.247             | 1  | 0.619        |
| <b>Detritivores</b>                                       | $\log_{10}(x)$ | 12.692   | 1  | <b>&lt;0.001</b> | 2.037    | 1  | 0.154        | 0.732             | 1  | 0.392        |
| <b>Predators</b>                                          | $\log_{10}(x)$ | 4.263    | 1  | <b>0.039</b>     | 7.520    | 1  | <b>0.006</b> | 0.004             | 1  | 0.949        |
| <b>Herbivores</b>                                         | $\log_{10}(x)$ | 1.593    | 1  | 0.207            | 0.369    | 1  | 0.544        | 2.767             | 1  | 0.096        |

(b)

| Model                                          | Linear hypotheses      | Estimate | Std. Error | z value | Pr(> z ) |    |
|------------------------------------------------|------------------------|----------|------------|---------|----------|----|
| Whole food web metabolism ~ Warming * Rainfall | ambient:1.7 - 0 == 0   | -0.003   | 0.077      | -0.043  | 0.999    |    |
|                                                | ambient:3.4 - 0 == 0   | -0.007   | 0.154      | -0.043  | 0.999    |    |
|                                                | ambient:3.4 - 1.7 == 0 | -0.003   | 0.077      | -0.043  | 0.999    |    |
|                                                | reduced:1.7 - 0 == 0   | 0.235    | 0.077      | 3.054   | 0.005    | ** |
|                                                | reduced:3.4 - 0 == 0   | 0.470    | 0.154      | 3.054   | 0.005    | ** |
|                                                | reduced:3.4 - 1.7 == 0 | 0.235    | 0.077      | 3.054   | 0.005    | ** |
| Microbial metabolism ~ Warming * Rainfall      | ambient:1.7 - 0 == 0   | 0.018    | 0.071      | 0.258   | 0.959    |    |
|                                                | ambient:3.4 - 0 == 0   | 0.037    | 0.142      | 0.258   | 0.959    |    |
|                                                | ambient:3.4 - 1.7 == 0 | 0.018    | 0.071      | 0.258   | 0.959    |    |
|                                                | reduced:1.7 - 0 == 0   | 0.250    | 0.073      | 3.448   | 0.001    | ** |
|                                                | reduced:3.4 - 0 == 0   | 0.500    | 0.145      | 3.448   | 0.001    | ** |
|                                                | reduced:3.4 - 1.7 == 0 | 0.250    | 0.073      | 3.448   | 0.001    | ** |

**Supplementary Table 5.** Post-hoc Tukey's HSD tests performed for linear mixed effects models with significant ( $p < 0.05$ ) and marginally significant ( $p < 0.1$ ) interaction terms in the second experiment (see Table 2). Asterisks denote significance levels: \*  $p < 0.05$ ; \*\*  $p < 0.01$ ; \*\*\*  $p < 0.001$ .

| Model                                           | Linear hypotheses      | Estimate | Std. Error | z value | Pr(> z ) |
|-------------------------------------------------|------------------------|----------|------------|---------|----------|
| Whole food<br>web energy<br>flux ~<br>Warming * | ambient:1.7 - 0 == 0   | 0.019    | 0.081      | 0.239   | 0.964    |
|                                                 | ambient:3.4 - 0 == 0   | 0.039    | 0.161      | 0.239   | 0.964    |
|                                                 | ambient:3.4 - 1.7 == 0 | 0.019    | 0.081      | 0.239   | 0.964    |
| Rainfall                                        | reduced:1.7 - 0 == 0   | -0.193   | 0.082      | -2.337  | 0.039 *  |
|                                                 | reduced:3.4 - 0 == 0   | -0.385   | 0.165      | -2.337  | 0.039 *  |
|                                                 | reduced:3.4 - 1.7 == 0 | -0.193   | 0.082      | -2.337  | 0.039 *  |
| Microbial<br>energy flux ~<br>Warming *         | ambient:1.7 - 0 == 0   | -0.009   | 0.077      | -0.115  | 0.992    |
|                                                 | ambient:3.4 - 0 == 0   | -0.018   | 0.153      | -0.115  | 0.992    |
|                                                 | ambient:3.4 - 1.7 == 0 | -0.009   | 0.077      | -0.115  | 0.992    |
| Rainfall                                        | reduced:1.7 - 0 == 0   | -0.222   | 0.078      | -2.826  | 0.009 ** |
|                                                 | reduced:3.4 - 0 == 0   | -0.444   | 0.157      | -2.826  | 0.009 ** |
|                                                 | reduced:3.4 - 1.7 == 0 | -0.222   | 0.078      | -2.826  | 0.009 ** |
| Whole food<br>web biomass<br>~ Warming *        | ambient:1.7 - 0 == 0   | 0.053    | 0.083      | 0.640   | 0.772    |
|                                                 | ambient:3.4 - 0 == 0   | 0.107    | 0.167      | 0.640   | 0.772    |
|                                                 | ambient:3.4 - 1.7 == 0 | 0.053    | 0.083      | 0.640   | 0.772    |
| Rainfall                                        | reduced:1.7 - 0 == 0   | -0.213   | 0.085      | -2.499  | 0.025 *  |
|                                                 | reduced:3.4 - 0 == 0   | -0.426   | 0.171      | -2.499  | 0.025 *  |
|                                                 | reduced:3.4 - 1.7 == 0 | -0.213   | 0.085      | -2.499  | 0.025 *  |
| Microbial<br>biomass ~<br>Warming *             | ambient:1.7 - 0 == 0   | 0.136    | 0.086      | 1.578   | 0.216    |
|                                                 | ambient:3.4 - 0 == 0   | 0.272    | 0.173      | 1.578   | 0.216    |
|                                                 | ambient:3.4 - 1.7 == 0 | 0.136    | 0.086      | 1.578   | 0.216    |
| Rainfall                                        | reduced:1.7 - 0 == 0   | -0.093   | 0.088      | -1.048  | 0.502    |
|                                                 | reduced:3.4 - 0 == 0   | -0.185   | 0.176      | -1.048  | 0.502    |
|                                                 | reduced:3.4 - 1.7 == 0 | -0.093   | 0.088      | -1.048  | 0.502    |
| Herbivore<br>biomass ~<br>Warming *             | ambient:1.7 - 0 == 0   | 0.041    | 0.083      | 0.493   | 0.857    |
|                                                 | ambient:3.4 - 0 == 0   | 0.082    | 0.165      | 0.493   | 0.857    |
|                                                 | ambient:3.4 - 1.7 == 0 | 0.041    | 0.083      | 0.493   | 0.857    |
| Rainfall                                        | reduced:1.7 - 0 == 0   | -0.214   | 0.085      | -2.524  | 0.023 *  |
|                                                 | reduced:3.4 - 0 == 0   | -0.427   | 0.169      | -2.524  | 0.023 *  |
|                                                 | reduced:3.4 - 1.7 == 0 | -0.214   | 0.085      | -2.524  | 0.023 *  |

**Supplementary Table 6.** (a) Nematode taxa identified in the first experiment (2010) and fresh body masses [ $\mu\text{g}$ ]. Fresh mass data were derived from “Nemaplex” ([http://plpnemweb.ucdavis.edu/nemaplex/Ecology/nematode\\_weights.htm](http://plpnemweb.ucdavis.edu/nemaplex/Ecology/nematode_weights.htm)). Fresh masses of subclasses, which were not available in the database, were assessed by taking the mean of all families within the respective subclasses, which were also present in 2015. (b) Nematode taxa identified in the second experiment (2015) and fresh body masses [ $\mu\text{g}$ ] derived from “Nemaplex” ([http://plpnemweb.ucdavis.edu/nemaplex/Ecology/nematode\\_weights.htm](http://plpnemweb.ucdavis.edu/nemaplex/Ecology/nematode_weights.htm)).

(a)

| <b>Taxon</b>                       | <b>Fresh mass [<math>\mu\text{g}</math>]</b> |
|------------------------------------|----------------------------------------------|
| Alaimina                           | 0.7564                                       |
| <i>Aphelenchoides</i> spp.         | 0.1616                                       |
| <i>Aphelenchus avenae</i>          | 0.2306                                       |
| Araeolaimida                       | 0.7256                                       |
| <i>Basiria</i> sp.                 | 0.1676                                       |
| <i>Cephalenchus leptus</i>         | 0.1239                                       |
| <i>Cephalenchus hexalineatus</i>   | 0.1239                                       |
| <i>Criconema sphagni</i>           | 0.4507                                       |
| <i>Ditylenchus anchilisposomus</i> | 0.5878                                       |
| <i>Ditylenchus</i> spp.            | 0.5878                                       |
| Dorylaimida                        | 9.7748                                       |
| Enoplida                           | 2.4757                                       |
| <i>Filenchus discrepans</i>        | 0.0483                                       |
| <i>Filenchus misellus</i>          | 0.0219                                       |
| <i>Filenchus</i> spp.              | 0.0984                                       |
| <i>Filenchus vulgaris</i>          | 0.1535                                       |
| <i>Lelenchus leptosoma</i>         | 0.0414                                       |
| Mononchida                         | 5.3291                                       |
| <i>Ogma menzeli</i>                | 0.7990                                       |
| <i>Ogma octangulare</i>            | 0.3676                                       |
| <i>Ogma</i> sp.                    | 0.7140                                       |
| other Tylenchida                   | 7.6246                                       |
| <i>Paratylenchus straeleni</i>     | 0.0456                                       |
| <i>Pseudhalenchus minutus</i>      | 0.0482                                       |
| Rhabditida                         | 2.5066                                       |

(b)

| <b>Taxon</b>            | <b>Fresh mass [<math>\mu\text{g}</math>]</b> |
|-------------------------|----------------------------------------------|
| <i>Acrobeles</i>        | 0.7113                                       |
| <i>Acrobelloides</i>    | 0.1481                                       |
| <i>Alaimus</i>          | 0.5340                                       |
| <i>Aphelenchoides</i>   | 0.1616                                       |
| <i>Aphelenchus</i>      | 0.2306                                       |
| <i>Aporcelaimellus</i>  | 8.8288                                       |
| <i>Axonchium</i>        | 3.7392                                       |
| Cephalobidae            | 0.4348                                       |
| <i>Cephalobus</i>       | 0.2702                                       |
| <i>Cervidellus</i>      | 0.1565                                       |
| <i>Chiloplacus</i>      | 0.5296                                       |
| <i>Clarkus</i>          | 4.3894                                       |
| <i>Coomansus</i>        | 6.7031                                       |
| <i>Coslenchus</i>       | 0.1095                                       |
| <i>Diphtherophora</i>   | 0.5039                                       |
| <i>Ditylenchus</i>      | 0.5878                                       |
| Dolichodoridae          | 0.4581                                       |
| <i>Dorylaimoides</i>    | 1.1588                                       |
| <i>Enchodelus</i>       | 3.6802                                       |
| <i>Epidorylaimus</i>    | 1.3937                                       |
| <i>Eudorylaimus</i>     | 3.3950                                       |
| <i>Eumonhystera</i>     | 0.2408                                       |
| <i>Filenchus</i>        | 0.0984                                       |
| <i>Geomonhystera</i>    | 0.2787                                       |
| <i>Gracilacus</i>       | 0.0328                                       |
| <i>Heterocephalobus</i> | 0.3559                                       |
| <i>Heterodera</i>       | 42.5256                                      |
| <i>Laimydorus</i>       | 4.5654                                       |
| <i>Mesodorylaimus</i>   | 1.4764                                       |
| <i>Mesorhabditis</i>    | 0.5676                                       |
| Nordiidae               | 2.3940                                       |
| <i>Panagrolaimus</i>    | 0.6375                                       |
| <i>Paraphelenchus</i>   | 0.3434                                       |
| <i>Paratylenchus</i>    | 0.0609                                       |
| <i>Plectus</i>          | 1.0183                                       |
| <i>Pratylenchus</i>     | 0.1397                                       |



|                          |        |
|--------------------------|--------|
| <i>Prismatolaimus</i>    | 0.4865 |
| Qudsianematidae          | 2.7639 |
| Rhabditidae dauer larvae | 5.3934 |
| <i>Rhabditis</i>         | 7.4997 |
| <i>Rhabdolaimus</i>      | 0.0795 |
| <i>Teratocephalus</i>    | 0.0895 |
| <i>Thonus</i>            | 1.9541 |
| <i>Tripyla</i>           | 4.0454 |
| Tylenchidae              | 0.1516 |
| <i>Tylencholaimellus</i> | 0.8698 |
| <i>Tylencholaimus</i>    | 0.5057 |
| <i>Tylenchorhynchus</i>  | 0.2082 |
| <i>Tylenchus</i>         | 0.5173 |
| <i>Tylocephalus</i>      | 0.2135 |
| <i>Wilsonema</i>         | 0.0543 |
| <i>Xiphinema</i>         | 4.3081 |

**Supplementary Table 7.** (a) Mean body lengths [mm] of soil mesofauna used for animals extracted in the first experiment (2010). Means are based on animals extracted in 2012 and 2015 at the same field sites. (b) Mean body lengths [mm] and length range of soil mesofauna extracted in the second experiment (2015).

(a)

| <b>Group</b>     | <b>Taxon</b>          | <b>Mean body length [mm]</b> |
|------------------|-----------------------|------------------------------|
| Acari            | Astigmata/Prostigmata | 0.21                         |
| Acari            | Mesostigmata          | 0.46                         |
| Acari            | Oribatida             | 0.35                         |
| Collembola       | Collembola            | 0.68                         |
| Insecta          | Hemiptera             | 0.74                         |
| Insecta          | Thysanoptera          | 0.83                         |
| other arthropods | Araneae               | 1.44                         |
| other arthropods | Diplura               | 1.67                         |
| other arthropods | Protura               | 0.73                         |
| other arthropods | Pseudoscorpionida     | 1.00                         |

(b)

| <b>Group</b>        | <b>Taxon</b>               | <b>Min<br/>[mm]</b> | <b>Max<br/>[mm]</b> | <b>Mean body<br/>length [mm]</b> | <b>Standard<br/>deviation</b> | <b>n</b> |
|---------------------|----------------------------|---------------------|---------------------|----------------------------------|-------------------------------|----------|
| Acari               | Astigmata/<br>Prostigmata  | 0.08                | 0.42                | 0.14                             | 0.03                          | 2585     |
| Acari               | Bdelloidea                 | 0.18                | 0.72                | 0.30                             | 0.12                          | 57       |
| Acari               | Eupodoidea                 | 0.08                | 0.50                | 0.18                             | 0.05                          | 1016     |
| Acari               | Gamasina                   | 0.10                | 1.68                | 0.40                             | 0.20                          | 614      |
| Acari               | Mesostigmata               | 0.18                | 0.32                | 0.22                             | 0.07                          | 4        |
| Acari               | Oribatida                  | 0.08                | 1.01                | 0.28                             | 0.14                          | 2275     |
| Acari               | Prostigmata<br>(predatory) | 0.13                | 0.53                | 0.36                             | 0.15                          | 7        |
| Acari               | Rhagidiidae                | 0.29                | 0.72                | 0.42                             | 0.09                          | 58       |
| Collembola          | Entomobryidae              | 0.16                | 3.04                | 0.58                             | 0.42                          | 194      |
| Collembola          | Isotomidae                 | 0.18                | 1.09                | 0.40                             | 0.16                          | 130      |
| Collembola          | Neanurinae                 | 0.72                | 0.72                | 0.72                             | NA                            | 1        |
| Collembola          | Neelidae                   | 0.11                | 0.24                | 0.17                             | 0.03                          | 61       |
| Collembola          | Onychiuridae               | 0.18                | 1.07                | 0.37                             | 0.12                          | 464      |
| Collembola          | Poduridae                  | 0.19                | 0.74                | 0.31                             | 0.15                          | 108      |
| Collembola          | Sminthuridae               | 0.10                | 0.82                | 0.26                             | 0.13                          | 103      |
| Insecta             | Aphidina                   | 0.30                | 1.28                | 0.59                             | 0.22                          | 30       |
| Insecta             | Coccina                    | 0.38                | 2.40                | 0.72                             | 0.34                          | 36       |
| Insecta             | Diptera-larvae             | 0.13                | 3.12                | 0.93                             | 0.61                          | 38       |
| Insecta             | Heteroptera nymphs         | 0.30                | 1.44                | 0.64                             | 0.22                          | 35       |
| Insecta             | other Hemiptera            | 0.35                | 2.24                | 1.32                             | 0.79                          | 6        |
| Insecta             | Thysanoptera               | 0.43                | 1.09                | 0.85                             | 0.25                          | 10       |
| other<br>arthropods | Araneae                    | 0.72                | 2.48                | 1.56                             | 0.79                          | 4        |
| other<br>arthropods | Diplura                    | 0.64                | 2.56                | 1.52                             | 0.41                          | 43       |
| other<br>arthropods | Paupoda                    | 0.14                | 0.92                | 0.35                             | 0.14                          | 102      |
| other<br>arthropods | Protura                    | 0.35                | 0.80                | 0.55                             | 0.16                          | 9        |
| other<br>arthropods | Symphyla                   | 0.85                | 2.37                | 1.64                             | 0.48                          | 10       |

**Supplementary Table 8.** Length-mass regressions from the literature to calculate body masses (M) from measured body lengths (L).

| Taxon      | Group                      | Mass type  | Equation (M[mg], L[mm])             | a      | b     | min [mm] | max [mm] | Reference           | Details of body length measurements                                            | Regression specificity      |
|------------|----------------------------|------------|-------------------------------------|--------|-------|----------|----------|---------------------|--------------------------------------------------------------------------------|-----------------------------|
| Acari      | all Mesostigmata           | fresh mass | $M = (10^a \times L^b) / 1000$      | 2.064  | 2.857 | 0.39     | 1.26     | Mercer et al., 2001 | anterior tip of the gnathosoma to the posterior margin of the notogaster       | Mesostigmata                |
| Acari      | all Prostigmata            | fresh mass | $M = (10^a \times L^b) / 1000$      | 2.124  | 2.808 | 0.14     | 1.12     | Mercer et al., 2001 | anterior tip of the gnathosoma to the posterior margin of the notogaster       | Prostigmata                 |
| Acari      | Bdelloidea                 | fresh mass | $M = (10^a \times L^b) / 1000$      | 2.124  | 2.808 | 0.14     | 1.12     | Mercer et al., 2001 | anterior tip of the gnathosoma to the posterior margin of the notogaster       | Prostigmata                 |
| Acari      | Eupodoidea                 | fresh mass | $M = (10^a \times L^b) / 1000$      | 2.124  | 2.808 | 0.14     | 1.12     | Mercer et al., 2001 | anterior tip of the gnathosoma to the posterior margin of the notogaster       | Prostigmata                 |
| Acari      | Gamasina                   | fresh mass | $M = (10^a \times L^b) / 1000$      | 2.064  | 2.857 | 0.14     | 1.12     | Mercer et al., 2001 | anterior tip of the gnathosoma to the posterior margin of the notogaster       | Mesostigmata                |
| Acari      | Oribatida                  | fresh mass | $M = (10^a \times L^b) / 1000$      | 2.146  | 2.77  | 0.24     | 1.19     | Mercer et al., 2001 | anterior tip of the gnathosoma to the posterior margin of the notogaster       | Cryptostigmata              |
| Acari      | Astigmata/ Prostigmata     | fresh mass | $M = (10^a \times L^b) / 1000$      | 2.124  | 2.808 | 0.14     | 1.12     | Mercer et al., 2001 | anterior tip of the gnathosoma to the posterior margin of the notogaster       | Prostigmata                 |
| Acari      | Rhagidiidae                | fresh mass | $M = (10^a \times L^b) / 1000$      | 2.124  | 2.808 | 0.14     | 1.12     | Mercer et al., 2001 | anterior tip of the gnathosoma to the posterior margin of the notogaster       | Prostigmata                 |
| Arachnida  | Araneae                    | fresh mass | $M = \exp(a) \times L^b$            | -1.958 | 2.746 | 0.56     | 2.5      | Höfer and Ott, 2009 | edge of prosoma (without chelicerae) to edge of opisthosoma (excl. spinnerets) | Araneae < 2.5 mm            |
| Arachnida  | Araneae                    | dry mass   | $M = \exp(a) \times L^b$            | -3.121 | 2.680 | 0.56     | 2.5      | Höfer and Ott, 2009 | edge of prosoma (without chelicerae) to edge of opisthosoma (excl. spinnerets) | Araneae < 2.5 mm            |
| Arachnida  | Pseudo-scorpionida         | fresh mass | $M = \exp(a) \times L^b$            | -1.892 | 2.515 | 0.86     | 2.1      | Höfer and Ott, 2009 | edge of prosoma (without chelicerae) to edge of opisthosoma (excl. spinnerets) | Pseudo-scorpiones           |
| Arachnida  | Pseudo-scorpionida         | dry mass   | $M = \exp(a) \times L^b$            | -2.967 | 2.771 | 0.86     | 2.1      | Höfer and Ott, 2009 | edge of prosoma (without chelicerae) to edge of opisthosoma (excl. spinnerets) | Pseudo-scorpiones           |
| Arthropoda | all                        | dry mass   | $M = a \times L^b$                  | 0.034  | 2.191 | 0.9      | 17.6     | Gruner, 2003        | tip of the abdomen to the end of the head or carapace                          | all arthropods              |
| Arthropoda | Diplura                    | dry mass   | $M = a \times L^b$                  | 0.034  | 2.191 | 0.9      | 17.6     | Gruner, 2003        | tip of the abdomen to the end of the head or carapace                          | all arthropods              |
| Arthropoda | Paupoda                    | dry mass   | $M = a \times L^b$                  | 0.034  | 2.191 | 0.9      | 17.6     | Gruner, 2003        | tip of the abdomen to the end of the head or carapace                          | all arthropods              |
| Arthropoda | Protura                    | dry mass   | $M = a \times L^b$                  | 0.034  | 2.191 | 0.9      | 17.6     | Gruner, 2003        | tip of the abdomen to the end of the head or carapace                          | all arthropods              |
| Arthropoda | Symphyla                   | dry mass   | $M = a \times L^b$                  | 0.034  | 2.191 | 0.9      | 17.6     | Gruner, 2003        | tip of the abdomen to the end of the head or carapace                          | all arthropods              |
| Collembola | All                        | fresh mass | $M = (10^a \times L^b) / 1000$      | 1.339  | 1.992 | 0.12     | 4.06     | Mercer et al., 2001 | anterior of the head to posterior of the abdomen                               | all Collembola              |
| Collembola | Entomobryidae              | fresh mass | $M = (b \times L^3) / 1000$         |        | 2.46  | 0.6      | 2.8      | Edwards, 1967       |                                                                                | Entomobryidae               |
| Collembola | Hypogastruridae            | fresh mass | $M = (b \times L^3) / 1000$         |        | 2.81  | 0.5      | 2.5      | Edwards, 1967       |                                                                                | Hypogastruridae             |
| Collembola | Isotomidae                 | fresh mass | $M = (b \times L^3) / 1000$         |        | 3.06  | 0.5      | 6.1      | Edwards, 1967       |                                                                                | Isotomidae                  |
| Collembola | Neanurinae                 | dry mass   | $M = (a \times L^b) / 1000$         | 10.715 | 2.24  | -        | -        | Tanaka, 1970        |                                                                                | Neanura sp.                 |
| Collembola | Neelidae                   | fresh mass | $M = (10^a \times L^b) / 1000$      | 1.339  | 1.992 | 0.12     | 4.06     | Mercer et al., 2001 | anterior of the head to posterior of the abdomen                               | all Collembola              |
| Collembola | Onychiuridae               | fresh mass | $M = (b \times L^3) / 1000$         |        | 2.22  | 0.5      | 2.5      | Edwards, 1967       |                                                                                | Onychiuridae                |
| Collembola | Sminthuridae               | fresh mass | $M = (b \times L^3) / 1000$         |        | 3.8   | 0.5      | 2        | Edwards, 1967       |                                                                                | Sminthuridae                |
| Insecta    | Aphidina                   | dry mass   | $M = a \times L^b$                  | 0.075  | 2.629 | 1.6      | 3.05     | Gruner 2003         | tip of the abdomen to the end of the head or carapace                          | Psyllidae & Aphidae         |
| Insecta    | Cicadina                   | dry mass   | $M = \exp(a) \times L^b$            | -3.735 | 2.561 | 2.13     | 13.25    | Sample et al., 1993 | From frons to tip of abdomen excluding appendages                              | Cicadellidae                |
| Insecta    | Coccina                    | dry mass   | $M = \exp(a) \times L^b$            | -2.823 | 2.225 | 2.13     | 13.25    | Sample et al., 1993 | From frons to tip of abdomen excluding appendages                              | Homoptera                   |
| Insecta    | Diptera larvae             | dry mass   | $M = a \times L^b$                  | 0.029  | 1.73  | 1.7      | 16.65    | Gruner, 2003        | tip of the abdomen to the end of the head or carapace                          | holometabolous larvae       |
| Insecta    | herbivorous insects (2010) | dry mass   | $M = \exp(a) \times L^b$            | -2.823 | 2.225 | 2.13     | 13.25    | Sample et al., 1993 | From frons to tip of abdomen excluding appendages                              | Homoptera                   |
| Insecta    | Heteroptera nymph          | dry mass   | $M = a \times L^b$                  | 0.0585 | 1.67  | 1.1      | 5.2      | Gruner, 2003        | tip of the abdomen to the end of the head or carapace                          | Homoptera larvae            |
| Insecta    | other insects              | dry mass   | $M = \exp(a) \times L^b$            | -3.628 | 2.494 | 2.13     | 54.51    | Sample et al., 1993 | From frons to tip of abdomen excluding appendages                              | all insects                 |
| Insecta    | Thysanoptera               | fresh mass | $M = (10^a \times L^b) \times 1000$ | -4.441 | 1.205 | 0.9      | 1.55     | Mercer et al., 2001 | anterior margin of the eye to final abdominal segment                          | <i>Apterothrips apteris</i> |

**Supplementary Table 9.** Relationship between dry body mass (DM) and fresh body mass (FM) of mesofaunal groups. Equations were applied for different taxa if body length could not be directly converted to dry body mass or fresh body mass.

| Taxon            | Equation (FM[mg], DM[mg])                    | a       | b      | Reference           | Regression specificity |
|------------------|----------------------------------------------|---------|--------|---------------------|------------------------|
| Acari            | $DM = a \times FM$                           | 0.431   |        | Edwards, 1967       | Acari                  |
| Collembola       | $FM = (10^a \times (DM/1000)^b) \times 1000$ | 0.0504  | 0.9547 | Mercer et al., 2001 | Collembola             |
| Collembola       | $DM = (10^a \times (FM/1000)^b) \times 1000$ | -0.5499 | 0.9402 | Mercer et al., 2001 | Collembola             |
| all other groups | $FM = (10^a \times (DM/1000)^b) \times 1000$ | 0.611   | 1.0213 | Mercer et al., 2001 | Insects                |
| all other groups | $DM = (10^a \times (FM/1000)^b) \times 1000$ | -0.693  | 0.9411 | Mercer et al., 2001 | Insects                |

**Supplementary Table 10.** Regression parameters from Ehnes et al. (2011) (Ref. 7) used to calculate individual metabolic rates. If possible the taxa-specific phylogenetic model was used:  $\ln w_e = \ln i_{oPG} + a_{PG} \ln M - E_{PG}(1/kT)$ ; For nematodes the linear model was used:  $\ln w_e = \ln i_o + a \ln M - E(1/kT)$ .  $w_e$  is the metabolic rate,  $a$  is the allometric exponent,  $E$  is the activation energy,  $k$  is the Boltzmann constant,  $T$  the temperature in Kelvin and  $i_o$  a normalisation factor.

| Regression group | Applied to taxa                             | $\ln i_o / \ln i_{oPG}$ | $a / a_{PG}$ | $E / E_{PG}$ | Model        |
|------------------|---------------------------------------------|-------------------------|--------------|--------------|--------------|
| Arachnida        | Araneae,<br>Pseudoscorpionida               | 24.581475               | 0.5652537    | 0.7093476    | phylogenetic |
| General          | Nematoda                                    | 23.055335               | 0.695071     | 0.68642      | linear       |
| Insecta          | Collembola,<br>Diplura, Insecta,<br>Protura | 21.97205                | 0.758895     | 0.6574038    | phylogenetic |
| Mesostigmata     | Mesostigmata                                | 9.674023                | 0.6904864    | 0.3792541    | phylogenetic |
| Oribatida        | Oribatida                                   | 22.02277                | 0.6793706    | 0.7060855    | phylogenetic |
| Progoneata       | Pauropoda,<br>Symphyla                      | 22.347024               | 0.5713411    | 0.6700449    | phylogenetic |
| Prostigmata      | all other Acari                             | 10.281495               | 0.6599399    | 0.3792541    | phylogenetic |

**Supplementary Table 11.** Assimilation efficiencies of the focal feeding guilds in this study. Animal efficiencies were taken from literature<sup>8,9</sup>. Microbial efficiency was assumed to vary around 0.60 (Ref. 10).

| <b>Feeding guild</b>    | <b>Assimilation efficiency</b> |
|-------------------------|--------------------------------|
| Microbes                | 0.55-0.65                      |
| Herbivorous nematodes   | 0.25                           |
| Herbivorous mesofauna   | 0.45                           |
| Bacterivorous nematodes | 0.60                           |
| Fungivorous nematodes   | 0.38                           |
| Detritivorous mesofauna | 0.50                           |
| Predatory nematodes     | 0.50                           |
| Predatory mites         | 0.60                           |
| Predatory mesofauna     | 0.60                           |

## Supplementary References

1. Mercer, R. D., Gabriel, A. G. A., Barendse, J., Marshall, D. J. & Chown, S. L. Invertebrate body sizes from Marion Island. *Antarct. Sci.* **13**, 135–143 (2001).
2. Höfer, H. & Ott, R. Estimating biomass of Neotropical spiders and other arachnids (Araneae, Opiliones, Pseudoscorpiones, Ricinulei) by mass-length regressions. *J. Arachnol.* **37**, 160–169 (2009).
3. Gruner, D. S. Regressions of length and width to predict arthropod biomass in the Hawaiian Islands. *Pacific Sci.* **57**, 325–336 (2003).
4. Edwards, C. A. in *Progress in soil biology* (eds. Graff, O. & Satchell, J.) 585–591 (North-Holland publishing company, 1967).
5. Tanaka, M. Ecological studies on communities of soil Collembola in Mt. Sobo, southwest Japan. *Japanese J. Ecol.* **20**, 102–110 (1970).
6. Sample, B. E. *et al.* Estimation of insect biomass by length and width. *Am. Midl. Nat.* **129**, 234–240 (1993).
7. Ehnes, R. B., Rall, B. C. & Brose, U. Phylogenetic grouping, curvature and metabolic scaling in terrestrial invertebrates. *Ecol. Lett.* **14**, 993–1000 (2011).
8. Hunt, H. W. *et al.* The detrital food web in a shortgrass prairie. *Biol. Fertil. Soils* **3**, 57–68 (1987).
9. De Ruiter, P. C. De *et al.* Simulation of nitrogen mineralization in the below-ground food webs of two winter wheat fields. *J. Appl. Ecol.* **30**, 95–106 (1993).
